# Supplementary material for: Effect of Land Use on Organic Carbon Storage Potential of Soils with Contrasting Native Organic Matter Content
Source: Hindawi journal article supplement (doi:10.1155/2020/8042961), 2020-03-31
Supplement: f1 [file 8042961.f1.pdf]

### Supplementary Information (SI)

**SI Table 1.** *p* values from the ANOVA showing the effect of land use on organic carbon (OC), nitrogen (N) and C:N ratios of bulk soils from four agroecological zones (AEZ)

| Parameters | AEZ 7   | AEZ 3   | AEZ 9   | AEZ 5   |
|------------|---------|---------|---------|---------|
| OC         | 7.5E-07 | 3.9E-07 | 3.3E-03 | 4.1E-08 |
| N          | 8.8E-04 | 2.4E-02 | 7.5E-03 | 3.0E-05 |
| C:N ratio  | 2.1E-03 | 3.3E-03 | 2.8E-03 | 4.6E-03 |

**SI Table 2.** *p* values from the ANOVA showing the effect of agroecological zones on organic carbon (OC), nitrogen (N) and C:N ratios of bulk soils from four land uses

| Parameters | Cropland | Orchard  | Grassland | Fallow   |
|------------|----------|----------|-----------|----------|
| OC         | 1.08E-05 | 5.09E-08 | 4.08E-06  | 3.47E-04 |
| N          | 1.01E-03 | 4.78E-05 | 4.00E-05  | 6.66E-04 |
| C:N ratio  | 3.54E-02 | 1.49E-03 | 9.56E-03  | 6.20E-02 |

**SI Table 3.** *p* values from the ANOVA showing the effect of land use on organic carbon (OC), nitrogen (N) and C:N ratios of soil fractions (POM=> 53  $\mu\text{m}$  and MOM = <53  $\mu\text{m}$ ) from four agroecological zones (AEZ)

| Parameters | AEZ 7   |         | AEZ 3   |         | AEZ 9   |         | AEZ 5    |          |
|------------|---------|---------|---------|---------|---------|---------|----------|----------|
|            | POM     | MOM     | POM     | MOM     | POM     | MOM     | POM      | MOM      |
| OC         | 8.6E-15 | 2.9E-10 | 8.6E-15 | 2.9E-10 | 1.3E-09 | 1.1E-06 | 9.36E-14 | 3.50E-05 |
| N          | 1.3E-15 | 2.9E-08 | 1.3E-15 | 2.9E-08 | 2.4E-11 | 1.2E-07 | 2.5E-14  | 1.5E-17  |
| C:N ratio  | 2.5E-14 | 2.2E-03 | 2.5E-14 | 2.2E-03 | 1.0E-06 | 6.6E-03 | 7.1E-09  | 3.6E-12  |

**SI Table 4.** *p* values from the ANOVA showing the variation of soil fractions on organic carbon (OC), nitrogen (N) and C:N ratios of soils from four land uses and agroecological zones (AEZ)

| Parameters | AEZ 7    |         |           |         | AEZ 3    |         |           |         |
|------------|----------|---------|-----------|---------|----------|---------|-----------|---------|
|            | Cropland | Orchard | Grassland | Fallow  | Cropland | Orchard | Grassland | Fallow  |
| OC         | 2.7E-06  | 2.1E-06 | 5.1E-03   | 7.2E-05 | 7.5E-07  | 9.2E-10 | 1.0E-05   | 1.7E-08 |
| N          | 4.6E-07  | 2.4E-09 | 9.3E-09   | 8.4E-07 | 6.7E-10  | 4.3E-06 | 8.3E-06   | 6.9E-05 |
| C:N ratio  | 1.7E-03  | 1.6E-03 | 1.5E-05   | 1.7E-01 | 8.1E-08  | 1.7E-04 | 6.1E-04   | 1.3E-02 |

  

| Parameters | AEZ 9    |         |           |         | AEZ 5    |         |           |         |
|------------|----------|---------|-----------|---------|----------|---------|-----------|---------|
|            | Cropland | Orchard | Grassland | Fallow  | Cropland | Orchard | Grassland | Fallow  |
| OC         | 4.8E-05  | 1.2E-04 | 1.8E-02   | 2.4E-04 | 4.6E-10  | 5.3E-08 | 4.3E-08   | 4.3E-11 |
| N          | 6.8E-06  | 2.0E-05 | 3.1E-04   | 1.0E-05 | 5.2E-09  | 1.2E-07 | 1.4E-07   | 7.1E-09 |
| C:N ratio  | 2.2E-02  | 3.2E-03 | 7.3E-04   | 3.1E-03 | 2.4E-08  | 5.5E-07 | 1.8E-08   | 4.3E-10 |
